# Supplementary material for: Heterogeneous Effects of Fructose on Blood Lipids in Individuals With Type 2 Diabetes
Source: Oxford University Press journal article supplement (doi:10.2337/dc09-0619), 2009-07-10
Supplement: dc090619-sup-sievenpiper_et_al-meta_fru-online_appendices-tables_a1-a3_fig_a1-diabetes_care-final.doc [file dc090619-sup-sievenpiper_et_al-meta_fru-online_appendices-tables_a1-a3_fig_a1-diabetes_care-final.doc]

| **Subgroup** | **Level** | **TAG** | | |  | **TC** | | |  | **LDL-C** | | |  | **HDL-C** | | |
| --- | --- | --- | --- | --- | --- | --- | --- | --- | --- | --- | --- | --- | --- | --- | --- | --- |
|  |  | **SMD (95% Cl)** | **P** | **I2** |  | **SMD (95% Cl)** | **P** | **I2** |  | **SMD (95% Cl)** | **P** | **I2** |  | **SMD (95% Cl)** | **P** | **I2** |
| **A priori** |  |  |  |  |  |  |  |  |  |  |  |  |  |  |  |  |
| Reference-CHO | Starch | -0.01 [-0.50, 0.49] | 0.97 | 73%¶** |  | 0.17 [-0.32, 0.67] | 0.49 | 82%¶ |  | 0.25 [-0.03, 0.53] | 0.08 | - |  | -0.01 [-0.46, 0.44] | 0.96 | - |
|  | Sucrose | -0.05 [-0.49, 0.39] | 0.81 | - |  | - | - | - |  | - | - | - |  | - | - | - |
|  | Mixed-CHO | **-** | **-** | - |  | - | - | - |  | - | - | - |  | - | - | - |
| Follow-Up | ≤4 wks | -0.48 [-1.14, 0.17] | 0.15 | 73%¶** |  | 0.17 [-0.32, 0.67] | 0.49 | 82%¶ |  | 0.25 [-0.03, 0.53] | 0.08 | - |  | -0.01 [-0.46, 0.44] | 0.96 | - |
|  | >4 wks | 0.10 [-0.49, 0.69] | 0.73 | - |  | - | - | - |  | - | - | - |  | - | - | - |
| Fructose Format | Crystalline | 0.15 [-1.07, 1.37] | 0.81 | 87%¶** |  | -0.07 [-0.34, 0.20] | 0.6 | - |  | 0.25 [-0.03, 0.53] | 0.08 | - |  | -0.01 [-0.46, 0.44] | 0.96 | - |
|  | Fluid | -0.36 [-0.75, 0.03] | 0.07 | - |  | - | - | - |  | - | - | - |  | - | - | - |
|  | Mixed | 0.02 [-0.42, 0.46] | 0.93 | - |  | 0.44 [0.11, 0.77] | 0.009 | - |  | - | - | - |  | - | - | - |
| Dose | >60g/d | 0.11 [-0.53, 0.75] | 0.75 | 74%¶** |  | 0.17 [-0.32, 0.67] | 0.49 | 82%¶ |  | 0.25 [-0.03, 0.53] | 0.08 | - |  | -0.01 [-0.46, 0.44] | 0.96 | - |
|  | ≤60g/d | -0.36 [-0.75, 0.03] | 0.07 | - |  | - | - | - |  | - | - | - |  | - | - | - |
| Randomization | Yes | -0.13 [-0.50, 0.23] | 0.47 | 36% |  | 0.44 [0.11, 0.77] | 0.009 | - |  | 0.25 [-0.03, 0.53] | 0.08 | - |  | -0.01 [-0.46, 0.44] | 0.96 | - |
|  | No | 0.18 [-0.92, 1.28] | 0.75 | 89%¶** |  | -0.07 [-0.34, 0.20] | 0.6 | - |  | - | - | - |  | - | - | - |
| MQS‡ | < 8 | 0.18 [-0.92, 1.27] | 0.75 | 89%¶** |  | -0.07 [-0.34, 0.20] | 0.6 | - |  | - | - | - |  | - | - | - |
|  | ≥ 8 | -0.13 [-0.50, 0.23] | 0.47 | 36% |  | 0.44 [0.11, 0.77] | 0.009 | - |  | 0.25 [-0.03, 0.53] | 0.08 | - |  | -0.01 [-0.46, 0.44] | 0.96 | - |
|  |  |  |  |  |  |  |  |  |  |  |  |  |  |  |  |  |
| **Post hoc** |  |  |  |  |  |  |  |  |  |  |  |  |  |  |  |  |
| Baseline§ | High | -0.48 [-1.14, 0.17] | 0.15 | - |  | - | - | - |  | - | - | - |  | -0.01 [-0.46, 0.44] | 0.96 | - |
|  | Low | - | - | - |  | 0.44 [0.11, 0.77] | 0.009 | - |  | 0.25 [-0.03, 0.53] | 0.08 | - |  | - | - | - |
| Dietary CHO|| | <55% E | 0.18 [-0.92, 1.28] | 0.75 | 89%¶** |  | - | - | - |  | - | - | - |  | - | - | - |
|  | ≥55% E | -0.17 [-0.65, 0.31] | 0.49 | 36% |  | 1.19 [0.72, 1.96] | 0.49 | 82%¶ |  | 0.25 [-0.03, 0.53] | 0.08 | - |  | -0.01 [-0.46, 0.44] | 0.96 | - |
| Dietary Fat|| | ≤30% E | -0.13 [-0.50, 0.23] | 0.47 | 36% |  | 0.44 [0.11, 0.77] | 0.009 | - |  | 0.25 [-0.03, 0.53] | 0.08 | - |  | -0.01 [-0.46, 0.44] | 0.96 | - |
|  | >30% E | -0.36 [-0.75, 0.03] | 0.07 | - |  | -0.07 [-0.34, 0.20] | 0.6 | - |  | - | - | - |  | - | - | - |
| Dietary Protein|| | <20% E | -0.13 [-0.50, 0.23] | 0.47 | 36% |  | 0.44 [0.11, 0.77] | 0.009 | - |  | 0.25 [-0.03, 0.53] | 0.08 | - |  | -0.01 [-0.46, 0.44] | 0.96 | - |
|  | ≥20% E | 0.18 [-0.92, 1.28] | 0.75 | 89%¶** |  | -0.07 [-0.34, 0.20] | 0.6 | - |  | - | - | - |  | - | - | - |
| Feeding Control | Metabolic | 0.11 [-0.53, 0.75] | 0.75 | 74%¶** |  | 0.17 [-0.32, 0.67] | 0.49 | 82%¶ |  | 0.25 [-0.03, 0.53] | 0.08 | - |  | -0.01 [-0.46, 0.44] | 0.96 | - |
|  | Non-Metabolic | -0.36 [-0.75, 0.03] | 0.07 | - |  | - | - | - |  | - | - | - |  | - | - | - |
| Design | Crossover | -0.03 [-0.51, 0.46] | 0.91 | 73%¶** |  | 0.17 [-0.32, 0.67] | 0.49 | 82%¶ |  | 0.25 [-0.03, 0.53] | 0.08 | - |  | -0.01 [-0.46, 0.44] | 0.96 | - |
|  | Parallel | - | - | - |  | - | - | - |  | - | - | - |  | - | - | - |
| Washout | Yes | - | - | - |  | 0.44 [0.11, 0.77] | 0.009 | - |  | - | - | - |  | - | - | - |
|  | No | -0.03 [-0.51, 0.46] | 0.91 | 73%¶** |  | -0.07 [-0.34, 0.20] | 0.6 | - |  | 0.25 [-0.03, 0.53] | 0.08 | - |  | -0.01 [-0.46, 0.44] | 0.96 | - |

**Table A1 - A priori and post hoc subgroup analyses exploring the effect of sources of heterogeneity on the effect of fructose exchange for carbohydrate (CHO) on blood lipids in type 1 diabetes*†**

*Empty cells denote no available data for subgroup analyses or where there are no data for heterogeneity in the presence of a corresponding effect estimate, the empty cell denotes that there is only data available from one study, precluding calculation of I2 and the corresponding P-value.

†Analyses are by the Generic Inverse Variance method using fixed or random (if heterogeneity significant at P<0.10) effects models with paired analyses for crossover trials (12).

‡Study quality was assessed by the Heyland Methodological Quality Score (MQS), where MQS≥8 is high quality (range 0-13) (13).

§Baseline thresholds for TAG (<1.7, ≥1.7), TC (<5.1, ≥5.1), LDL-C (<3.3, ≥3.3), and HDL-C (<1.1, ≥1.1); units mmol/L (1).

||Macronutrient thresholds for dietary carbohydrate (CHO), fat, and protein (Pro) were selected based on the approximate midpoint of the recommended ranges identified by the European (EASD) (6), Canadian (CDA) (5), and American (ADA) Diabetes Associations (4).

¶Significant heterogeneity by Cochrane’s Q (Chi2, P<0.10).

¶Significant heterogeneity (P<0.10).

| **Subgroup** | **Level** | **TAG** | | |  | **TC** | | |  | **LDL-C** | | |  | **HDL-C** | | |
| --- | --- | --- | --- | --- | --- | --- | --- | --- | --- | --- | --- | --- | --- | --- | --- | --- |
|  |  | **SMD (95% Cl)** | **P** | **I2** |  | **SMD (95% Cl)** | **P** | **I2** |  | **SMD (95% Cl)** | **P** | **I2** |  | **SMD (95% Cl)** | **P** | **I2** |
| **A priori** |  |  |  |  |  |  |  |  |  |  |  |  |  |  |  |  |
| Reference-CHO | Starch | 0.24 [0.05, 0.44] | 0.01 | 0% |  | 0.08 [-0.19, 0.35] | 0.56 | 76%¶ |  | 0.06 [-0.07, 0.18] | 0.36 | 0% |  | -0.01 [-0.06, 0.03] | 0.58 | 34% |
|  | Sucrose | 0.04 [-0.20, 0.29] | 0.73 | 0% |  | -0.15 [-0.32, 0.02] | 0.09 | 0% |  | -0.08 [-0.29, 0.13] | 0.46 | 0% |  | -0.01 [-0.07, 0.05] | 0.7 | 0% |
|  | Mixed-CHO | -0.33 [-0.98, 0.31] | 0.31 | 80%¶** |  | -0.25 [-0.55, 0.05] | 0.1 | 74%¶ |  | -0.14 [-0.36, 0.08] | 0.23 | 0% |  | -0.00 [-0.04, 0.03] | 0.81 | 0% |
| Follow-Up | ≤4 wks | 0.18 [0.00, 0.35] | 0.05 | 0% |  | 0.04 [-0.17, 0.25] | 0.71 | 78%¶ |  | 0.03 [-0.09, 0.14] | 0.66 | 15% |  | 0.00 [-0.03, 0.04] | 0.94 | 0% |
|  | >4 wks | 0.17 [-0.13, 0.46] | 0.27 | 0% |  | -0.18 [-0.44, 0.08] | 0.18 | 60%¶ |  | -0.13 [-0.35, 0.08] | 0.22 | 0% |  | 0.05 [-0.14, 0.25] | 0.6 | 91%¶** |
| Fructose Format | Crystalline | -0.26 [-0.96, 0.44] | 0.47 | 81%¶** |  | -0.28 [-0.47, -0.09] | 0.005 | 49% |  | 0.00 [-0.15, 0.15] | 0.99 | 27% |  | 0.06 [-0.14, 0.27] | 0.54 | 92%¶** |
|  | Fluid | 0.24 [-0.03, 0.52] | 0.08 | 48% |  | -0.08 [-0.36, 0.21] | 0.6 | 70%¶ |  | -0.01 [-0.14, 0.11] | 0.82 | 14% |  | 0.00 [-0.04, 0.04] | 0.97 | 0% |
|  | Mixed | 0.05 [-0.17, 0.27] | 0.68 | 0% |  | 0.08 [-0.18, 0.35] | 0.54 | 70%¶ |  | -0.08 [-1.06, 0.90] | 0.88 | - |  | -0.00 [-0.05, 0.04] | 0.94 | 0% |
| Dose | >60g/d | 0.18 [0.00, 0.37] | 0.05 | 5% |  | 0.07 [-0.19, 0.32] | 0.61 | 72%¶ |  | 0.00 [-0.12, 0.12] | 0.99 | 0% |  | 0.00 [-0.04, 0.04] | 0.93 | 0% |
|  | ≤60g/d | -0.19 [-0.70, 0.33] | 0.48 | 74%¶** |  | -0.22 [-0.45, 0.01] | 0.06 | 65%¶ |  | -0.02 [-0.18, 0.13] | 0.76 | 0% |  | 0.04 [-0.10, 0.18] | 0.56 | 89%¶** |
| Randomization | Yes | 0.05 [-0.37, 0.47] | 0.81 | 75%¶** |  | -0.03 [-0.28, 0.23] | 0.83 | 79%¶ |  | 0.03 [-0.09, 0.15] | 0.65 | 4% |  | 0.06 [-0.12, 0.24] | 0.52 | 89%¶** |
|  | No | -0.00 [-0.22, 0.21] | 0.97 | 0% |  | -0.19 [-0.34, -0.05] | 0.01 | 0% |  | -0.06 [-0.21, 0.09] | 0.42 | 0% |  | -0.01 [-0.04, 0.03] | 0.74 | 0% |
| MQS‡ | < 8 | 0.05 [-0.23, 0.33] | 0.73 | 0% |  | -0.19 [-0.34, -0.05] | 0.01 | 0% |  | -0.06 [-0.21, 0.09] | 0.42 | 0% |  | -0.01 [-0.05, 0.03] | 0.79 | 0% |
|  | ≥ 8 | 0.05 [-0.30, 0.39] | 0.78 | 73%¶** |  | -0.03 [-0.28, 0.23] | 0.83 | 79%¶ |  | 0.03 [-0.09, 0.15] | 0.65 | 4% |  | 0.04 [-0.08, 0.17] | 0.5 | 86%¶** |
|  |  |  |  |  |  |  |  |  |  |  |  |  |  |  |  |  |
| **Post hoc** |  |  |  |  |  |  |  |  |  |  |  |  |  |  |  |  |
| Baseline§ | High | 0.13 [-0.23, 0.50] | 0.48 | 56%¶ |  | -0.03 [-0.21, 0.15] | 0.74 | 51%¶ |  | -0.02 [-0.14, 0.10] | 0.76 | 0% |  | 0.03 [-0.05, 0.11] | 0.48 | 0% |
|  | Low | -0.29 [-1.03, 0.44] | 0.44 | 81%¶** |  | -0.16 [-0.76, 0.43] | 0.59 | 87%¶ |  | 0.09 [-0.10, 0.27] | 0.33 | 0% |  | 0.04 [-0.09, 0.17] | 0.54 | 91%¶** |
| Dietary-CHO|| | <55% E | -0.08 [-0.70, 0.54] | 0.79 | 80%¶** |  | -0.21 [-0.48, 0.06] | 0.13 | 69%¶ |  | -0.02 [-0.18, 0.13] | 0.76 | 0% |  | 0.05 [-0.14, 0.24] | 0.58 | 90%¶** |
|  | ≥55% E | 0.05 [-0.12, 0.22] | 0.57 | 0% |  | 0.06 [-0.15, 0.26] | 0.58 | 64%¶ |  | 0.00 [-0.12, 0.12] | 0.99 | 0% |  | -0.00 [-0.03, 0.03] | 0.95 | 0% |
| Dietary Fat|| | ≤30% E | 0.13 [-0.03, 0.29] | 0.1 | 3% |  | 0.04 [-0.14, 0.21] | 0.69 | 63%¶ |  | 0.02 [-0.08, 0.12] | 0.7 | 0% |  | -0.01 [-0.04, 0.02] | 0.5 | 0% |
|  | >30% E | -1.40 [-4.31, 1.51] | 0.35 | 92%¶** |  | -0.33 [-0.52, -0.15] | 0.0004 | 36% |  | -0.14 [-0.36, 0.08] | 0.23 | 0% |  | 0.13 [-0.12, 0.37] | 0.31 | 90%¶** |
| Dietary Protein|| | <20% E | -0.05 [-0.40, 0.30] | 0.77 | 64%¶** |  | -0.13 [-0.43, 0.16] | 0.38 | 79%¶ |  | -0.03 [-0.13, 0.07] | 0.57 | 0% |  | 0.09 [-0.06, 0.25] | 0.23 | 88%¶** |
|  | ≥20% E | 0.15 [-0.07, 0.38] | 0.19 | 49% |  | -0.04 [-0.26, 0.19] | 0.73 | 63%¶ |  | 0.08 [-0.13, 0.30] | 0.44 | - |  | -0.02 [-0.07, 0.02] | 0.3 | 12% |
| Feeding Control | Metabolic | 0.21 [0.01, 0.42] | 0.04 | 16% |  | 0.13 [-0.18, 0.44] | 0.41 | 70%¶ |  | 0.10 [-0.05, 0.24] | 0.19 | 0% |  | 0.00 [-0.06, 0.07] | 0.89 | 0% |
|  | Non-metabolic | -0.11 [-0.51, 0.29] | 0.6 | 68%¶** |  | -0.19 [-0.36, -0.01] | 0.04 | 57%¶ |  | -0.08 [-0.21, 0.04] | 0.18 | 0% |  | 0.03 [-0.07, 0.14] | 0.54 | 89%¶** |
| Design | Crossover | 0.13 [-0.02, 0.27] | 0.08 | 0% |  | -0.05 [-0.22, 0.13] | 0.59 | 73%¶ |  | -0.00 [-0.10, 0.09] | 0.92 | 20% |  | 0.02 [-0.05, 0.10] | 0.55 | 85%¶** |
|  | Parallel | -2.03 [-4.05, -0.01] | 0.05 | 64%¶ |  | -0.51 [-1.62, 0.60] | 0.37 | 67%¶ |  | -0.13 [-0.68, 0.41] | 0.63 | 0% |  | 0.03 [-0.52, 0.57] | 0.92 | 0% |
| Washout | Yes | 0.31 [-0.22, 0.84] | 0.25 | 66%¶** |  | -0.08 [-0.42, 0.27] | 0.67 | 83%¶ |  | -0.01 [-0.14, 0.11] | 0.82 | 14% |  | 0.00 [-0.05, 0.05] | 0.96 | 0% |
|  | No | 0.08 [-0.09, 0.24] | 0.35 | 0% |  | -0.10 [-0.22, 0.02] | 0.1 | 29% |  | -0.00 [-0.15, 0.15] | 1 | 0% |  | 0.03 [-0.07, 0.13] | 0.6 | 85%¶** |

**Table A2 - A priori and post hoc subgroup analyses exploring the effect of sources of heterogeneity on the effect of fructose exchange for carbohydrate (CHO) on blood lipids in type 2 diabetes*†**

*Empty cells denote no available data for subgroup analyses or where there are no data for heterogeneity in the presence of a corresponding effect estimate, the empty cell denotes that there is only data available from one study, precluding calculation of I2 and the corresponding P-value.

†Analyses are by the Generic Inverse Variance method using fixed or random (if heterogeneity significant at P<0.10) effects models with paired analyses for crossover trials (12).

‡Study quality was assessed by the Heyland Methodological Quality Score (MQS), where MQS≥8 is high quality (range 0-13) (13).

§Baseline thresholds for TAG (<1.7, ≥1.7), TC (<5.1, ≥5.1), LDL-C (<3.3, ≥3.3), and HDL-C (<1.1, ≥1.1); units mmol/L (1).

||Macronutrient thresholds for dietary carbohydrate (CHO), fat, and protein (Pro) were selected based on the approximate midpoint of the recommended ranges identified by the European (EASD) (6), Canadian (CDA) (5), and American (ADA) Diabetes Associations (4).

¶Significant heterogeneity by Cochrane’s Q (Chi2, P<0.10).

**Removal of Osei et al 1987 (19) explained heterogeneity for TAG (I2<5%, P≥0.10) and removal of Osei et al 1989 (23) rendered heterogeneity non-significant for HDL-C (I+=0%, P≥0.10).

**Table A3 - Multiple Regression models for TAG and TC***

| **Model** | **** | **SE** | **Partial-R2** | **P value** |
| --- | --- | --- | --- | --- |
| **TAG** |  |  |  |  |
| **Metabolic freeding control** | **0.74081** | **0.24916** | **0.446** | **0.013** |
| **Crossover design** | **1.85552** | **0.43397** | **0.624** | **0.001** |
| **Starch reference CHO** | **0.64294** | **0.28606** | **0.315** | **0.046** |
| Sucrose reference CHO | 0.46604 | 0.26507 | 0.219 | 0.106 |
| **Fluid format** | **0.66389** | **0.26747** | **0.359** | **0.030** |
| Mixed format | 0.20657 | 0.21807 | 0.075 | 0.364 |
| **Dose (% E)** | **-0.06214** | **0.02719** | **0.322** | **0.043** |
| **Follow-up (d)** | **0.00487** | **0.00172** | **0.423** | **0.016** |
| **(Full model, R2=0.72, P=0.027)** |  |  |  |  |
|  |  |  |  |  |
|  |  |  |  |  |
| **TC** |  |  |  |  |
| MQS† | 0.12526 | 0.09241 | 0.234 | 0.224 |
| Crossover design | 0.27467 | 0.22722 | 0.196 | 0.272 |
| Starch reference CHO | 0.18032 | 0.16409 | 0.168 | 0.314 |
| Sucrose reference CHO | -0.26519 | 0.17038 | 0.288 | 0.171 |
| Fluid format | -0.14449 | 0.13754 | 0.155 | 0.334 |
| Mixed format | 0.34760 | 0.18858 | 0.362 | 0.115 |
| Dietary fat (% E) | 0.06186 | 0.02599 | 0.486 | 0.055 |
| **Dose (% E)** | **0.05954** | **0.01637** | **0.688** | **0.011** |
| **Follow-up (d)** | **0.00477** | **0.00119** | **0.728** | **0.007** |
| **(Full model, R2=0.86, P=0.051)** |  |  |  |  |

*Inverse variance weighted All Possible regression was used to select the best model for multiple

regression using the R2 criterion for triglycerides (TAG) and total cholesterol (TC). Bolded variables

in each model represent significant independent predictors (Multiple Regression with inverse variance weighting , P<0.05).

†Study quality was assessed by the Heyland Methodological Quality Score (MQS) (13).

**Figure A1** – Funnel plots for the effect of isocaloric exchange of fructose for carbohydrate (CHO) on triglycerides (TAG), total-cholesterol (TC), LDL-cholesterol (LDL-C), and HDL-cholesterol (HDL-C) for all comparisons in people with type 1 and type 2 diabetes reported in 16 trials. The dashed line represents the pooled effect estimate for each analysis.
